# Supplementary material for: Sensitive and selective detection of zinc ions in neuronal vesicles using PYDPY1, a simple turn-on dipyrrin
Source: Royal Society of Chemistry journal article supplement (doi:10.1039/c1cc12181b), 2011-01-01
Supplement: c1cc12181b.pdf [file c1cc12181b.pdf]

## Experimental

### General Information

All reactions were run under nitrogen atmosphere. Commercial reagents were used as received, unless otherwise stated. Silica gel was used for chromatography, and silica gel plates with fluorescence  $F_{254}$  were used for thin-layer chromatography (TLC) analysis. Data for  $^1\text{H}$  are reported as follows: chemical shift (ppm) relative to TMS at 0.00 ppm, coupling constant ( $J$ -value, Hz), and multiplicity ( $s$  = singlet,  $d$  = doublet,  $t$  = triplet,  $q$  = quartet,  $m$  = multiplet). Data for  $^{13}\text{C}$  NMR are reported as ppm relative to  $\text{CDCl}_3$  77.0 ppm. High (HRMS) resolution mass spectra were obtained by using electrospray ionization (ESI). Fluorescence measurements were performed on a FluoroMax-2 spectrofluorometer. Absorption spectra were measured on Cary 3E UV-Visible spectrophotometer.

Values of fluorescence quantum yields was determined in the reference to perylene in toluene that have a reported  $\Phi_F$  of 0.75.<sup>1</sup> Images were made in a Leica stereo zoom macrofluorescence imager, with using 480 nm bp for excitation and 530 nm bp for emission (GFP Filter cube).

### Synthesis of 5-Phenyl-4,6-dipyrrin<sup>3</sup>:

To a stirred solution of **1** (7.53 cm<sup>3</sup>, 74.50 mmol) in **2** (230.0 cm<sup>3</sup>, 3.32 mol) at 23 °C, under Ar (g), was added catalytic amount of trifluoroacetic acid (0.55 cm<sup>3</sup>, 7.45 mmol). After 30 min. the reaction mixture was evaporated under reduced pressure. The residue was dissolved in dichloromethane (70 cm<sup>3</sup>) and washed with a 1.0 M solution of NaOH (aq) (100 cm<sup>3</sup>). The aqueous layer was back extracted with dichloromethane (70 cm<sup>3</sup>) and the combined organic layers were dried ( $\text{MgSO}_4$ ) and concentrated under reduced pressure. The resulting residue was purified by silica gel chromatography (EtOAc/Hexane/ Dichloromethane = 1/8/1) and gave as a yellow solid dipyrrole **3**<sup>2</sup> (8.75g, 53%).  $^1\text{H}$  NMR (500 MHz,  $\text{CDCl}_3$ ):  $\delta$  7.86 (br s, 2H), 7.31 (t, 2H,  $J$  = 7.5), 7.25 (t, 1H,  $J$  = 7.5), 7.20 (d, 2H,  $J$  = 7.5), 6.66 (d, 2H,  $J$  = 1.5), 6.15 (m, 2H), 5.91 (m, 2H), 5.45 (s, 1H).

To a stirred solution of **3** (467.2mg, 2.10 mmol) in THF (100 cm<sup>3</sup>) at 0 °C, under Ar (g), was added *p*-chloranil (568.5 mg, 2.31 mmol). After 1 h the reaction mixture was heated to 23 °C. After 2 h the reaction mixture was evaporated under reduced pressure and the residue was purified by silica gel chromatography (EtOAc/Hexane/Dichloromethane = 1/8/1) and gave as a yellow-brown solid dipyrin **4** (212.8 mg, 46%). Total yield was 24% for two steps.  $^1\text{H}$  NMR (500 MHz,  $\text{CDCl}_3$ ):  $\delta$  7.67 (s, 2H), 7.49-7.41 (m, 5H), 6.61 (d, 2H,  $J$  = 4.0 Hz), 6.41-6.39 (m, 2H).  $^{13}\text{C}$  NMR (125 MHz,  $\text{CDCl}_3$ ):  $\delta$  143.6, 142.7, 139.9, 137.2, 130.8, 129.6, 129.0, 127.5, 117.5.

### Synthesis of 5-(Anthracen-9-yl)-4,6-dipyrrin:

To a stirred solution of **5** (5.0000 g, 24.20 mmol) in **2** (84 cm<sup>3</sup>, 1.2 mol) at 23 °C, under Ar (g), was added a catalytic amount of trifluoroacetic acid (0.180 cm<sup>3</sup>, 2.40 mmol). After 30 min. the reaction mixture was evaporated under reduced pressure. The residue was dissolved in dichloromethane (70 cm<sup>3</sup>) and washed with a 1.0 M solution of NaOH (aq) (100 cm<sup>3</sup>). The aqueous layer was back extracted with dichloromethane (70 cm<sup>3</sup>) and the combined organic layers were dried ( $\text{MgSO}_4$ ) and concentrated under reduced pressure. The residue was partially purified by silica gel chromatography (EtOAc/Hexane = 1/4) to give a crude dipyrrole **6** (3.2800 g) as a yellow solid.

To a stirred solution of crude dipyrrole **6** (200.0 mg) in dichloromethane (30 cm<sup>3</sup>) at 23 °C, under Ar (g), was added a solution of *p*-chloranil (182.9 mg, 0.74 mmol) in dichloromethane (100 cm<sup>3</sup>). After 48 h the reaction mixture was evaporated under reduced pressure and the residue was then purified by silica gel chromatography (EtOAc/Hexane = 1/10) and gave as a yellow solid the dipyrin **7** [72.6 mg, 16% (for both steps)].  $^1\text{H}$  NMR (500 MHz,  $\text{CDCl}_3$ ):  $\delta$  8.55 (s, 1H), 8.03 (d, 2H,  $J$  = 9.5), 7.89 (d, 2H,  $J$  = 9.0), 7.67 (s, 2H), 7.46-7.42 (m, 2H), 7.37-7.33 (m, 2H), 6.22 (dd, 2H,  $J$  = 4.0, 1.0), 6.01 (dd, 2H,  $J$  = 4.0, 1.0).  $^{13}\text{C}$  NMR (125 MHz,  $\text{CDCl}_3$ ):  $\delta$  143.7, 142.3, 140.8, 131.1, 130.9, 130.8, 128.4, 128.2, 127.7, 126.8, 126.0, 125.3, 118.1. HRMS (ESI) calcd for  $\text{C}_{23}\text{H}_{17}\text{N}_2$  [ $\text{MH}^+$ ] 321.1392, found 321.1381.

### Synthesis of 5-(Pyren-1-yl)-4,6-dipyrrin:

To a stirred mixture of **8** (0.8 g, 3.47 mmol) and **2** (18.0 cm<sup>3</sup>, 260.40 mmol) at 25 °C, under Ar (g), was added a catalytic amount of trifluoroacetic acid (0.027 cm<sup>3</sup>, 0.35 mmol). After 30 min. the reaction mixture was evaporated under reduced pressure. The residue was dissolved in dichloromethane (50 cm<sup>3</sup>) and washed with a 1.0 M solution of NaOH (aq) (50 cm<sup>3</sup>). The aqueous layer was back extracted with dichloromethane (50 cm<sup>3</sup>) and the combined organic layers were dried ( $\text{MgSO}_4$ ) and concentrated under reduced pressure. The residue was partially purified by silica gel chromatography (EtOAc/Hexane = 1/4) and gave as a yellow solid dipyrrole **9** (404.6 mg).

To a stirred solution of crude dipyrrole **9** (202.3 mg) in dichloromethane (30 cm<sup>3</sup>) at 23 °C, under Ar (g), was added a solution of *p*-chloranil (172.3 mg, 0.70 mmol) in dichloromethane (100 cm<sup>3</sup>). After 12 h the reaction mixture was

evaporated under reduced pressure and residue was purified by silica gel chromatography (EtOAc/Hexane/Dichloromethane = 1/8/1) to give as a dark red solid dipyrin **10** [103.8 mg, 17% (for both steps)]. <sup>1</sup>H NMR (500 MHz, CDCl<sub>3</sub>): δ 8.21-8.17 (m, 2H), 8.13-8.09 (m, 3H), 8.02-7.98 (m, 3H), 7.93 (d, 1H, *J* = 9.5), 7.69 (s, 2H), 6.28 (d, 2H, *J* = 4.5), 6.23 (d, 2H, *J* = 4.0). <sup>13</sup>C NMR (125 MHz, CDCl<sub>3</sub>): δ 143.8, 141.6, 140.6, 131.8, 131.5, 131.3, 130.8, 130.5, 129.2, 128.2, 128.1, 127.8, 127.2, 126.2, 125.6, 125.5, 125.4, 124.4, 124.3, 123.7, 117.8. HRMS (ESI) calcd for C<sub>25</sub>H<sub>17</sub>N<sub>2</sub> [MH<sup>+</sup>] 345.1392, found 345.1397.

#### Preparation and Staining of Tissue Section

A 10 mM stock solution of **4** (PyDPy1) (1 mg, 2.9 μmol) was prepared in DMSO (0.1 cm<sup>3</sup>) and diluted into in 50 mM solution of HEPES (pH 7.4, 0.02/10 cm<sup>3</sup>) (aq) to give a working concentration of 10 μM. Sections were cut fresh and unfixed on a freezing microtome, at 30 μm, and sections were thawed onto clean glass slides and allowed to dry for 10 min to 24 h at +4 °C. To stain, the section was laid flat and the **4**/DMSO/HEPES solution (1.2 cm<sup>3</sup>) was pipetted onto the surface and left for 1 to 3 min. Excess was poured off and images were made while the sections were wet and without coverslips.

#### Preparation of acute hippocampal slices

Hippocampal slices were prepared from 25-30 days old Swiss Webster mice (from Hilltop labs). The mice were deeply anesthetized with an isofuran, and brains were removed and placed in an ice-cold preparation solution containing: Sucrose (220 mM), KCl (3 mM), NaH<sub>2</sub>PO<sub>4</sub> (1.25 mM), MgSO<sub>4</sub> (6 mM), NaHCO<sub>3</sub> (26 mM), CaCl<sub>2</sub> (0.2 mM), Glucose (10 mM).

Slices (300 μm) were cut using a Leica vibratome (VT 1200) and equilibrated for 1 h at 35 °C in artificial CSF (ACSF) containing: NaCl (126 mM), KCl (3 mM), NaH<sub>2</sub>PO<sub>4</sub> 1.25 (mM), MgSO<sub>4</sub> (1 mM), NaHCO<sub>3</sub> (26 mM), CaCl<sub>2</sub> (2 mM), Glucose (10 mM), 290 mOsm with Sucrose.

For recordings, the slices were placed in a flow-through chamber (RC-27L chamber with plastic slice anchor, Warner instruments) mounted on the stage of an upright microscope (BX51WI Olympus, Japan) and perfused with oxygenated ACSF (95% O<sub>2</sub> / 5% CO<sub>2</sub>) at 2 cm<sup>3</sup>/min. Experiments were performed at 32 ± 0.5 °C.

The slice preparations were loaded with of the fluorescent indicator (**4**), (final concentration 70 μM) diluted in ACSF as follows: the ACSF perfusion was stopped and 1 cm<sup>3</sup> of dye-containing ACSF was added; 5 min. later the perfusion was restored for the next 5 min., the perfusion was stopped again and dye was re-introduced for 5 more min.

The indicator was excited at 482(20) nm via a 40x water-immersion objective. Emitted fluorescence was collected at 532 (40) nm using a Hamamatsu CCD camera. Images were acquired and analyzed with METAFLUOR 7.0 software (Universal Imaging).

#### Oxygen-glucose deprivation in slices

To modulate hypoxic-hypoglycemic conditions, ACSF bathing solution was changed to an identical solution lacking glucose and bubbled with 95% N<sub>2</sub> / 5% CO<sub>2</sub>.

#### References

1. Olmsted, J., *J. Phys. Chem.* **1979**, 83, 2581-2584.
2. Lee, C.-H.; Lindsey, J. S., *Tetrahedron* **1994**, 50, 11427-11440.
3. Brückner, C.; Karunaratne, V.; Rettig, S. J.; Dolphin, D., *Can. J. Chem.* **1996**, 74, 2182-2193.
